# Supplementary material
Source: PubMed Central journal article supplement (PMC7595763)
Supplement: NIHMS1617987-supplement-supp_table.pdf [file NIHMS1617987-supplement-supp_table.pdf]

**Table S1: Cell Line Characterization**

| <b>Cell Line</b>    | <b>Cancer Type</b> | <b>Subtype</b>                       | <b>Culture Properties</b>                | <b>EPCAM expression</b>   |
|---------------------|--------------------|--------------------------------------|------------------------------------------|---------------------------|
| <b>MDA-MB-231TD</b> | Breast             | Basal B <sup>1</sup>                 | Adherent                                 | Low <sup>2</sup>          |
| <b>MDA-MB-436</b>   | Breast             | Basal B <sup>1</sup>                 | Adherent                                 | Low-Negative <sup>2</sup> |
| <b>MCF-7</b>        | Breast             | Luminal <sup>1</sup>                 | Highly Adherent                          | High <sup>3</sup>         |
| <b>SNU-C1</b>       | Colon              | Transit-Amplifying (TA) <sup>4</sup> | Suspended                                | High <sup>5</sup>         |
| <b>T84</b>          | Colon              | Transit-Amplifying (TA) <sup>4</sup> | Highly Adherent                          | High <sup>6</sup>         |
| <b>H1755</b>        | Lung               | Non-small cell (NSCLC)               | Adherent with single cells in suspension | Negative <sup>7</sup>     |
| <b>H1944</b>        | Lung               | Non-small cell (NSCLC)               | Adherent                                 | N/A                       |
| <b>H2087</b>        | Lung               | Non-small cell (NSCLC)               | Adherent                                 | N/A                       |
| <b>PC-3</b>         | Prostate           | Androgen Receptor (AR)- <sup>8</sup> | Adherent                                 | Low-Moderate <sup>9</sup> |
| <b>LNCaP</b>        | Prostate           | Androgen Receptor (AR)+ <sup>8</sup> | Loosely Adherent                         | High <sup>9</sup>         |

## References

- 1 Neve, R. M. *et al.* A collection of breast cancer cell lines for the study of functionally distinct cancer subtypes. *Cancer Cell* **10**, 515-527, doi:10.1016/j.ccr.2006.10.008 (2006).
- 2 Li, W. M., Zhou, L. L., Zheng, M. & Fang, J. Selection of Metastatic Breast Cancer Cell-Specific Aptamers for the Capture of CTCs with a Metastatic Phenotype by Cell-SELEX. *Mol Ther Nucleic Acids* **12**, 707-717, doi:10.1016/j.omtn.2018.07.008 (2018).
- 3 Sterzynska, K., Kempisty, B., Zawierucha, P. & Zabel, M. Analysis of the specificity and selectivity of anti-EpCAM antibodies in breast cancer cell lines. *Folia Histochem Cytobiol* **50**, 534-541, doi:10.5603/17845 (2012).
- 4 Sadanandam, A. *et al.* A colorectal cancer classification system that associates cellular phenotype and responses to therapy. *Nat Med* **19**, 619-625, doi:10.1038/nm.3175 (2013).
- 5 Park, B. S. *et al.* Comparison of putative circulating cancer stem cell detection between the hepatic portal system and peripheral blood in colorectal cancer patients. *Ann Surg Treat Res* **87**, 232-238, doi:10.4174/astr.2014.87.5.232 (2014).
- 6 Gelderman, K. A., Kuppen, P. J., Bruin, W., Fleuren, G. J. & Gorter, A. Enhancement of the complement activating capacity of 17-1A mAb to overcome the effect of membrane-bound complement regulatory proteins on colorectal carcinoma. *Eur J Immunol* **32**, 128-135, doi:10.1002/1521-4141(200201)32:1<128::AID-IMMU128>3.0.CO;2-P (2002).
- 7 Watanabe, M. *et al.* A novel flow cytometry-based cell capture platform for the detection, capture and molecular characterization of rare tumor cells in blood. *J Transl Med* **12**, 143, doi:10.1186/1479-5876-12-143 (2014).
- 8 Tai, S. *et al.* PC3 is a cell line characteristic of prostatic small cell carcinoma. *Prostate* **71**, 1668-1679, doi:10.1002/pros.21383 (2011).
- 9 Lowes, L. E. *et al.* Epithelial-to-mesenchymal transition leads to disease-stage differences in circulating tumor cell detection and metastasis in pre-clinical models of prostate cancer. *Oncotarget* **7**, 76125-76139, doi:10.18632/oncotarget.12682 (2016).
